# Supplementary material for: SARS-CoV-2 virus masking of RBD epitopes; unmasking and cross-reactivity induced by mRNA vaccines
Source: Research Square preprint supplement (doi:10.21203/rs.3.rs-591752/v1), 2021-06-21
Supplement: Supplementary file 1 [file 577d1d636e3c8aac1820b1fd.xlsx]

## Sheet: CohortFeb2021.coor
	SARS.CoV.2.NP	SARS.CoV.2.S1+S2	SARS.CoV.2.S2	SARS.CoV.2.S1.mFcTag	SARS.CoV.2.S1	SARS.CoV.2.S1.HisTag	SARS.CoV.2.S1.RBD.mFc	SARS.CoV.2.Spike.RBD.rFc	SARS.CoV.2.Spike.RBD.His.Bac	SARS.CoV.2.Spike.RBD.His.HEK	SARS.CoV.NP	SARS.CoV.S1.HisTag	SARS.CoV.S1.RBD.HisTag	SARS.CoV.S1.RBD.rFcTag	MERS.CoV.NP	MERS.CoV.S1.ECD.1-1297.HisTag	MERS.CoV.S1.RBD.367.606.rFcTag	DcCoV.HKU23.NP	hCoV.229E.S1	hCoV.229E.S1_S2	hCoV.HKU1.NP	hCoV.HKU1.S1_AA1.760	hCoV.HKU1.S1_S2	hCoV.NL63.NP	hCoV.NL63.S1	hCoV.NL63.S1_S2	hCoV.OC43.HE	hCoV.OC43.NP	hCoV.OC43.S1_S2ECD.HisTag	Flu.B_Mal/.HA1	Flu.B_Mal/.HA1+HA2	Flu.B_Phu/.HA1	Flu.B_Phu/.HA1+HA2	Flu.H1N1.HA1	Flu.H1N1.HA1+HA2	Flu.H3N2.HA1	Flu.H3N2.HA1+HA2
SARS.CoV.2.NP	1
SARS.CoV.2.S1+S2	0.0854664	1
SARS.CoV.2.S2	0.327592	0.532282	1
SARS.CoV.2.S1.mFcTag	0.0299121	0.868207	0.336699	1
SARS.CoV.2.S1	0.082891	0.815567	0.553357	0.776121	1
SARS.CoV.2.S1.HisTag	0.0809268	0.773268	0.515632	0.791292	0.923622	1
SARS.CoV.2.S1.RBD.mFc	0.0522083	0.837145	0.418451	0.902011	0.870348	0.910184	1
SARS.CoV.2.Spike.RBD.rFc	0.0581395	0.83437	0.452789	0.891259	0.897687	0.944537	0.958921	1
SARS.CoV.2.Spike.RBD.His.Bac	0.117126	0.712462	0.556322	0.711994	0.898295	0.913504	0.859888	0.887835	1
SARS.CoV.2.Spike.RBD.His.HEK	0.114801	0.655192	0.547612	0.666104	0.85247	0.920619	0.813759	0.870023	0.93342	1
SARS.CoV.NP	0.93285	0.0675884	0.302005	0.0202678	0.0633326	0.0635009	0.0392298	0.0435774	0.0973769	0.0975342	1
SARS.CoV.S1.HisTag	0.182129	0.234731	0.483625	0.162834	0.469918	0.411182	0.283233	0.31581	0.521966	0.528951	0.168519	1
SARS.CoV.S1.RBD.HisTag	0.157417	0.364342	0.53102	0.302564	0.622522	0.61198	0.461878	0.514266	0.717951	0.736158	0.142874	0.827661	1
SARS.CoV.S1.RBD.rFcTag	0.119805	0.472865	0.525957	0.417561	0.722842	0.712333	0.583336	0.637535	0.77841	0.802421	0.103834	0.736399	0.929666	1
MERS.CoV.NP	0.0344895	0.0107519	0.0351547	0.00319368	0.0143528	0.0111576	0.0075573	0.00835869	0.0142006	0.0119616	0.0366931	0.0266868	0.0228831	0.0216968	1
MERS.CoV.S1.ECD.1-1297.HisTag	0.0528663	0.217958	0.317808	0.154854	0.237255	0.18334	0.173155	0.182856	0.186515	0.171307	0.0475993	0.211649	0.175461	0.193569	0.00953466	1
MERS.CoV.S1.RBD.367.606.rFcTag	0.00134822	0.0111637	0.0174493	0.0014049	0.0265584	0.00254776	0.00237407	0.00283384	0.00476245	0.00173784	0.00133539	0.120908	0.0293356	0.0406199	0.000360895	0.147496	1
DcCoV.HKU23.NP	0.00290507	0.0234153	0.0284991	0.00906727	0.0222102	0.0144454	0.01456	0.0149957	0.0146909	0.013204	0.00210891	0.0106548	0.0103608	0.0187136	0.0189793	0.0680168	0.014633	1
hCoV.229E.S1	0.00875139	0.00490267	0.00723007	0.00265904	0.00894803	0.00724478	0.00580909	0.0065359	0.00817736	0.00897581	0.00907903	0.0112231	0.011103	0.0130175	0.00529094	0.0197174	0.00527183	0.06584	1
hCoV.229E.S1_S2	0.0101097	0.0197194	0.023846	0.00771372	0.0298896	0.0134034	0.0125263	0.0134688	0.0159908	0.0112258	0.0108031	0.0453419	0.0252207	0.0298058	0.00930341	0.0939988	0.119269	0.0816164	0.819998	1
hCoV.HKU1.NP	0.000532504	0.0180147	0.0199353	0.00943619	0.0221832	0.0161965	0.0146325	0.0150008	0.0147582	0.0156129	0.000924195	0.006771	0.00908846	0.0150688	0.0227326	0.0546483	0.00542371	0.457877	0.0346541	0.0449694	1
hCoV.HKU1.S1_AA1.760	0.00179524	0.0199561	0.0165583	0.00894031	0.0154755	0.00997456	0.0105251	0.00956376	0.0111605	0.0078736	0.0016778	0.0101197	0.00669532	0.0098989	0.00671292	0.0190062	0.00248952	0.0982305	0.109636	0.108204	0.131424	1
hCoV.HKU1.S1_S2	0.103036	0.137114	0.217535	0.0606057	0.139266	0.0937665	0.0902391	0.0883056	0.126263	0.093057	0.092133	0.13704	0.131519	0.143163	0.0296682	0.168238	0.0570035	0.129355	0.105981	0.175659	0.0871508	0.181341	1
hCoV.NL63.NP	0.0482398	0.0454187	0.0643095	0.0236361	0.0414971	0.0303722	0.0353077	0.0335481	0.0402082	0.0311846	0.0539595	0.0324748	0.0389246	0.0507115	0.0102034	0.0806724	0.00986568	0.179355	0.0848062	0.103841	0.103738	0.043316	0.157337	1
hCoV.NL63.S1	0.00159595	0.00779375	0.00810675	0.00290249	0.0125026	0.0125345	0.00712922	0.00906615	0.0110492	0.0127562	0.00033928	0.0118461	0.0152249	0.0192509	0.0117061	0.0455915	0.0178385	0.0513658	0.174961	0.146144	0.0357688	0.0533789	0.0771933	0.109847	1
hCoV.NL63.S1_S2	0.0137718	0.0458788	0.0415932	0.0202496	0.046836	0.031818	0.029065	0.0300964	0.0287452	0.0244228	0.0099734	0.0442446	0.034945	0.0490604	0.0161888	0.142615	0.0757917	0.081671	0.222129	0.294193	0.0384192	0.0671391	0.201565	0.193309	0.663673	1
hCoV.OC43.HE	0.0035035	0.0110023	0.0180416	0.00292692	0.0125852	0.0101492	0.00816392	0.008786	0.0123278	0.0108619	0.00318187	0.0119743	0.0142782	0.0160257	0.00526668	0.0294028	0.0056018	0.102616	0.0632956	0.0606861	0.0485728	0.118076	0.110716	0.0302082	0.111893	0.112213	1
hCoV.OC43.NP	0.00129924	0.0111794	0.0204259	0.00359903	0.0157175	0.0102139	0.00798927	0.0095288	0.0135874	0.0130225	0.000498858	0.00969503	0.0136123	0.0177394	0.0122033	0.0386094	0.00743307	0.715826	0.0321545	0.0331187	0.381786	0.0535847	0.0834396	0.123824	0.0526705	0.051968	0.0874155	1
hCoV.OC43.S1_S2ECD.HisTag	0.111293	0.155738	0.243858	0.0764516	0.146213	0.121801	0.107215	0.108069	0.122323	0.108665	0.102615	0.132452	0.124673	0.144099	0.0371605	0.314752	0.0322641	0.243856	0.0998314	0.158746	0.108587	0.148251	0.461042	0.171563	0.0857509	0.24575	0.166269	0.15086	1
Flu.B_Mal/.HA1	0.00105119	0.0207944	0.00839547	0.0131482	0.0209915	0.0157187	0.0264189	0.0216528	0.0191365	0.0129821	0.00302683	0.00961395	0.0137983	0.0237858	0.011706	0.0396981	0.0141272	0.0762119	0.0634601	0.0786499	0.0475137	0.0473685	0.102276	0.0919368	0.101264	0.158497	0.047661	0.0597567	0.0941596	1
Flu.B_Mal/.HA1+HA2	0.000352112	0.042209	0.0139487	0.0288076	0.0398377	0.0278331	0.0416499	0.0370353	0.0314491	0.0214643	0.00138987	0.0184151	0.0209212	0.0361231	0.00913697	0.0331416	0.0188993	0.0772812	0.0928773	0.135939	0.0332836	0.0600946	0.150651	0.107311	0.0689032	0.189374	0.03558	0.0445217	0.12682	0.678754	1
Flu.B_Phu/.HA1	7.47781e-07	0.0295048	0.0147028	0.0171079	0.0316776	0.0283041	0.0327745	0.0311	0.0312725	0.028897	8.15291e-05	0.0235173	0.0297327	0.0390261	0.0242208	0.0395037	0.00838863	0.104373	0.0676036	0.0781201	0.0763212	0.0673689	0.0972882	0.0818091	0.0988896	0.152346	0.083105	0.0791973	0.134042	0.398495	0.375947	1
Flu.B_Phu/.HA1+HA2	0.00094877	0.0380706	0.0147227	0.0260151	0.0167131	0.00746371	0.0197782	0.0163694	0.0114251	0.00876941	0.000610209	0.00521738	0.00531991	0.0102413	0.00744651	0.0153079	0.0035179	0.0504052	0.0450234	0.0606294	0.0168077	0.0399198	0.120651	0.0671271	0.0159512	0.0888153	0.0303114	0.0171444	0.0964512	0.186567	0.412726	0.351219	1
Flu.H1N1.HA1	0.0114531	0.0194089	0.0256279	0.007568	0.0307721	0.0192028	0.0159431	0.0180283	0.0251744	0.0197906	0.00910513	0.0269393	0.0307294	0.0276765	0.0140614	0.0196804	0.00269107	0.0441724	0.0361832	0.0422276	0.0283793	0.0152268	0.0666754	0.0627132	0.0431609	0.0824355	0.0224106	0.0284091	0.0624537	0.0913017	0.146263	0.171975	0.129541	1
Flu.H1N1.HA1+HA2	0.0176039	0.0233038	0.0271024	0.0124267	0.0299208	0.0208867	0.0211837	0.0198112	0.0278323	0.021069	0.0160396	0.0239493	0.0270936	0.0252791	0.0165616	0.0200113	0.000654621	0.0372289	0.039286	0.0477475	0.0193603	0.0218524	0.0858487	0.0736568	0.0347511	0.0831988	0.0206843	0.0147216	0.0914672	0.102153	0.176153	0.164217	0.210431	0.809241	1
Flu.H3N2.HA1	0.000876643	0.0178136	0.0139281	0.00454228	0.0199973	0.0148009	0.012954	0.0148699	0.0139388	0.0130148	9.17945e-06	0.0105627	0.0168809	0.0266976	0.00914516	0.0253593	0.0126461	0.0836981	0.0349879	0.0522507	0.0778447	0.0302734	0.0898946	0.0727353	0.050439	0.0994545	0.0407848	0.0842309	0.0892674	0.176472	0.191078	0.188478	0.112092	0.1522	0.115475	1
Flu.H3N2.HA1+HA2	0.00591827	0.0374686	0.0206526	0.0259876	0.0175249	0.00679772	0.0174765	0.0149586	0.0136821	0.00702744	0.00421451	0.00659573	0.0063661	0.0105565	0.00318121	0.00946621	0.000556825	0.0189689	0.0146917	0.0310471	0.00469227	0.0105013	0.104966	0.0488208	0.000888798	0.0447592	0.0088889	0.00743726	0.0805427	0.0781258	0.219696	0.0825315	0.477915	0.102573	0.192545	0.259875	1
