# Supplementary material for: SARS-CoV-2 virus masking of RBD epitopes; unmasking and cross-reactivity induced by mRNA vaccines
Source: Research Square preprint supplement (doi:10.21203/rs.3.rs-591752/v1), 2021-06-21
Supplement: Supplementary file 3 [file a84945c93e1bf79d3a17ac62.xlsx]

## Sheet: CohortOCPHDec20.coor
	SARS.CoV.2.NP	SARS.CoV.2.S1+S2	SARS.CoV.2.S2	SARS.CoV.2.S1.mFcTag	SARS.CoV.2.S1	SARS.CoV.2.S1.HisTag	SARS.CoV.2.S1.RBD.mFc	SARS.CoV.2.Spike.RBD.rFc	SARS.CoV.2.Spike.RBD.His.Bac	SARS.CoV.2.Spike.RBD.His.HEK	SARS.CoV.NP	SARS.CoV.S1.HisTag	SARS.CoV.S1.RBD.HisTag	SARS.CoV.S1.RBD.rFcTag	MERS.CoV.NP	MERS.CoV.S1.ECD.1-1297.HisTag	MERS.CoV.S1.RBD.367.606.rFcTag	DcCoV.HKU23.NP	hCoV.229E.S1	hCoV.229E.S1_S2	hCoV.HKU1.NP	hCoV.HKU1.S1_AA1.760	hCoV.HKU1.S1_S2	hCoV.NL63.NP	hCoV.NL63.S1	hCoV.NL63.S1_S2	hCoV.OC43.HE	hCoV.OC43.NP	hCoV.OC43.S1_S2ECD.HisTag	Flu.B_Mal/.HA1	Flu.B_Mal/.HA1+HA2	Flu.B_Phu/.HA1	Flu.B_Phu/.HA1+HA2	Flu.H1N1.HA1	Flu.H1N1.HA1+HA2	Flu.H3N2.HA1	Flu.H3N2.HA1+HA2
SARS.CoV.2.NP	1
SARS.CoV.2.S1+S2	0.634508	1
SARS.CoV.2.S2	0.630239	0.967066	1
SARS.CoV.2.S1.mFcTag	0.677257	0.691146	0.712066	1
SARS.CoV.2.S1	0.457014	0.691846	0.711542	0.653751	1
SARS.CoV.2.S1.HisTag	0.573124	0.575582	0.610605	0.934317	0.653542	1
SARS.CoV.2.S1.RBD.mFc	0.628203	0.624042	0.654709	0.966914	0.646883	0.95204	1
SARS.CoV.2.Spike.RBD.rFc	0.59232	0.586784	0.621848	0.946356	0.64644	0.970003	0.977418	1
SARS.CoV.2.Spike.RBD.His.Bac	0.490897	0.548437	0.595761	0.788567	0.73992	0.85558	0.849537	0.871642	1
SARS.CoV.2.Spike.RBD.His.HEK	0.460864	0.454792	0.500289	0.802663	0.575383	0.914752	0.870231	0.909898	0.891186	1
SARS.CoV.NP	0.924637	0.642315	0.655456	0.756607	0.502205	0.653735	0.71831	0.681867	0.567956	0.542244	1
SARS.CoV.S1.HisTag	0.018885	0.131603	0.149415	0.0243237	0.390237	0.0332026	0.0300215	0.031422	0.174956	0.0459327	0.0199972	1
SARS.CoV.S1.RBD.HisTag	0.0703105	0.170101	0.190031	0.102722	0.395862	0.132096	0.119863	0.126959	0.315669	0.161496	0.078602	0.617215	1
SARS.CoV.S1.RBD.rFcTag	0.0831189	0.218367	0.230176	0.117944	0.506371	0.146105	0.134204	0.146884	0.309967	0.166653	0.089479	0.648147	0.830966	1
MERS.CoV.NP	0.0547634	0.0523189	0.053598	0.0465189	0.0681148	0.0476919	0.044654	0.0476262	0.0532409	0.0459116	0.0627804	0.0189409	0.0282437	0.0427186	1
MERS.CoV.S1.ECD.1-1297.HisTag	0.240583	0.477708	0.508013	0.242657	0.581649	0.205623	0.226361	0.215959	0.299649	0.165735	0.249907	0.425375	0.306184	0.404056	0.046838	1
MERS.CoV.S1.RBD.367.606.rFcTag	0.000838076	0.0761403	0.0784706	3.72545e-06	0.26711	2.73095e-06	4.20757e-07	4.94672e-05	0.044346	2.8069e-05	0.000208029	0.794492	0.400254	0.545039	0.0135444	0.393866	1
DcCoV.HKU23.NP	0.00231268	0.000552442	0.000564695	0.00131079	0.00202419	0.00100793	0.00119579	0.00100421	1.11261e-05	0.000768501	0.00186568	0.00735783	0.00824105	0.0148926	0.032573	0.0102169	0.0104465	1
hCoV.229E.S1	0.00625121	0.00657956	0.00666282	0.00187918	0.011055	0.00176657	0.00292562	0.00316618	0.00732002	0.00285197	0.00696041	0.00894502	0.00994496	0.016849	0.0137231	0.0130897	0.00788735	0.088099	1
hCoV.229E.S1_S2	0.00734802	0.0424846	0.0406704	0.00239428	0.0582942	0.00169788	0.00217041	0.00224995	0.0134976	0.00151312	0.00632387	0.0892612	0.0551308	0.0883058	0.0257791	0.0843305	0.0946461	0.10692	0.749315	1
hCoV.HKU1.NP	0.00683889	0.00293415	0.00336829	0.000123868	0.00652124	8.00579e-05	0.00020407	0.000226434	0.00218327	4.53051e-05	0.00720308	0.0100619	0.0119987	0.0161533	0.0244515	0.0132106	0.0136252	0.437939	0.0779474	0.0627162	1
hCoV.HKU1.S1_AA1.760	0.0068169	0.00295339	0.00318324	0.000878696	0.0058935	0.00098799	0.00188365	0.00210772	0.00542246	0.00212752	0.00701898	0.00429767	0.00865167	0.0115245	0.00842938	0.009403	0.00398313	0.100421	0.173499	0.125695	0.156622	1
hCoV.HKU1.S1_S2	0.138955	0.198545	0.172853	0.0728884	0.128649	0.0581	0.0647536	0.0584415	0.0754113	0.0423381	0.097448	0.04234	0.064914	0.10844	0.0212171	0.13989	0.0386053	0.0722234	0.0654336	0.153558	0.0439049	0.0939795	1
hCoV.NL63.NP	0.0674031	0.0332917	0.0294727	0.0117963	0.0248384	0.00973641	0.0111641	0.0101872	0.0139016	0.00649306	0.0467705	0.00847426	0.015762	0.0289752	0.0232195	0.0374336	0.0101364	0.157621	0.0890439	0.104473	0.0912921	0.0529274	0.239076	1
hCoV.NL63.S1	0.00493636	0.00143789	0.00187088	0.00181889	0.00429859	0.00314653	0.00319946	0.00429483	0.00878429	0.00514599	0.0057207	0.00292328	0.00802421	0.0058955	0.00914353	0.0076613	0.00224314	0.0347061	0.150639	0.0628089	0.0636729	0.107166	0.0233511	0.0967995	1
hCoV.NL63.S1_S2	0.00730556	0.0396809	0.0356592	0.00387567	0.028427	0.00287091	0.00277132	0.00272635	0.00826875	0.00132266	0.00568122	0.0280223	0.0221681	0.0327473	0.0144727	0.0510633	0.0317428	0.0768067	0.18111	0.312401	0.0416738	0.0819359	0.235858	0.181454	0.36431	1
hCoV.OC43.HE	0.00147129	0.00236116	0.00204678	0.000421824	0.00481447	0.000627113	0.000869306	0.00136118	0.0048725	0.00165867	0.00178525	0.0075882	0.00950326	0.010145	0.00919417	0.0163854	0.00713348	0.0915762	0.0842094	0.0412122	0.0737039	0.0984016	0.0378385	0.0303393	0.150958	0.0580897	1
hCoV.OC43.NP	0.000415892	5.87922e-05	0.000110379	0.00109891	0.00106731	0.000662637	0.000827727	0.000396624	2.09568e-05	0.000277552	0.000395519	0.00305845	0.00281922	0.00714844	0.0276595	0.00471533	0.00721218	0.595154	0.0729759	0.0740187	0.456903	0.0769325	0.0245854	0.076845	0.0654168	0.0505093	0.099609	1
hCoV.OC43.S1_S2ECD.HisTag	0.109405	0.237956	0.22795	0.0942724	0.140125	0.0706732	0.0804754	0.0760792	0.083929	0.0516003	0.109704	0.0452687	0.0528906	0.0699532	0.0390765	0.160911	0.0332936	0.159634	0.0912629	0.234561	0.0766456	0.106136	0.428194	0.111537	0.0412952	0.332831	0.121114	0.11281	1
Flu.B_Mal/.HA1	0.000367421	3.24531e-05	4.74514e-05	0.000218564	0.00123927	8.34434e-05	6.73939e-06	6.23834e-06	0.00137376	2.56861e-05	0.000318835	0.00269772	0.00577698	0.00718423	0.0188609	0.00298533	0.0024924	0.0746963	0.0890179	0.0743337	0.053836	0.0449058	0.0275788	0.0482502	0.0697952	0.0690477	0.0528094	0.0652997	0.0491253	1
Flu.B_Mal/.HA1+HA2	0.00196754	0.00672315	0.0049546	9.1578e-08	0.00273424	2.91015e-05	3.6266e-07	9.27511e-08	0.000501424	8.96557e-05	0.000757124	0.00172222	0.0032778	0.00716817	0.0164063	0.0024195	0.00185558	0.0789541	0.0992069	0.173792	0.0326707	0.0451687	0.140745	0.0852972	0.0230588	0.187018	0.0218414	0.042815	0.173752	0.659696	1
Flu.B_Phu/.HA1	0.00145779	0.00450117	0.00383749	0.000257784	0.0035921	0.000128969	0.000373436	0.000619122	0.00216848	0.000161762	0.00167918	0.00255245	0.00370897	0.00527014	0.0187183	0.00387264	0.00167025	0.0706824	0.0788964	0.0961998	0.0443003	0.0357012	0.0381995	0.0424145	0.0483697	0.0982732	0.0434409	0.0572077	0.100503	0.523933	0.501907	1
Flu.B_Phu/.HA1+HA2	0.00296502	0.0195004	0.0138092	0.00012249	0.00322991	2.36226e-05	2.47352e-05	7.37457e-05	8.75133e-05	0.000545907	0.000535162	0.00212479	0.00220984	0.00436656	0.00262193	0.0025625	0.00181272	0.0354738	0.0329748	0.146981	0.00278439	0.00822883	0.244042	0.059641	0.000566796	0.191641	9.37322e-06	0.00260537	0.212101	0.146578	0.521695	0.341957	1
Flu.H1N1.HA1	0.00420155	0.017342	0.0133213	0.00235701	0.00546252	0.00117051	0.00161745	0.00140825	0.00222251	0.000320888	0.00264356	0.00142951	0.00256418	0.00344971	0.0109878	0.00367876	0.000789819	0.0201246	0.0305711	0.0910227	0.00571747	0.00315211	0.0995789	0.0375472	0.00342173	0.131975	0.00999369	0.010786	0.163875	0.179647	0.351834	0.285911	0.334107	1
Flu.H1N1.HA1+HA2	0.00585068	0.0183382	0.0137617	0.00171613	0.00481037	0.000628165	0.000971808	0.000673774	0.00170252	8.60098e-05	0.00344742	0.00197796	0.00279228	0.00411719	0.00926055	0.00329709	0.000821521	0.0232738	0.0245303	0.0887837	0.00312563	0.00225033	0.134497	0.0517221	0.000107476	0.122427	0.00668846	0.00410004	0.161602	0.150116	0.343453	0.248732	0.419563	0.882795	1
Flu.H3N2.HA1	0.00209877	0.0141788	0.00975453	9.98387e-05	0.00238859	2.23568e-06	3.51212e-07	1.45395e-06	0.000317001	0.000146031	0.000345912	0.000975517	0.00121645	0.00218428	0.00773849	0.00290373	0.001831	0.042911	0.0545124	0.127978	0.0231918	0.0129088	0.130571	0.0577141	0.0236704	0.208181	0.0247274	0.0380242	0.219466	0.169366	0.321756	0.261078	0.298692	0.361208	0.307544	1
Flu.H3N2.HA1+HA2	0.00775036	0.0334781	0.0232314	0.00115834	0.00396551	0.000186588	0.000183657	7.34121e-05	0.000499131	5.83925e-05	0.00168148	0.000968339	0.00143406	0.0029728	0.000749371	0.00214286	0.000570302	0.0130944	0.0165447	0.123097	3.96466e-05	0.00120616	0.307289	0.0695403	0.00205416	0.207996	8.1702e-06	8.01599e-05	0.268364	0.033593	0.278537	0.101457	0.606331	0.367046	0.436657	0.514092	1
